# Supplementary material for: Local artifacts in ice core methane records caused by layered bubble trapping and in situ production: a multi-site investigation
Source: Copernicus journal article supplement (doi:10.5194/cp-12-1061-2016), 2016-04-26
Supplement: Supplementary file 2 [file cp-12-1061-2016-supplement.zip]

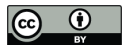

## *Supplement of*

# **Local artifacts in ice core methane records caused by layered bubble trapping and in situ production: a multi-site investigation**

**Rachael H. Rhodes et al.**

*Correspondence to:* Rachael H. Rhodes (rhr34@cam.ac.uk)

- cp-12-1061-2016-supplement-title-page.pdf
- Rhodes\_CP\_2016\_Supplement
  - .DS\_Store
  - CH4\_allcores\_1yr\_resample\_Fig2
    - \* .DS\_Store
    - \* B40\_CH4\_1yr\_Rhodes2016.txt
    - \* D4\_CH4\_1yr\_Rhodes2016.txt
    - \* NEEMSC\_CH4\_1yr\_Rhodes2016.txt
    - \* NGRIP\_CH4\_1yr\_Rhodes2016.txt
    - \* Tunu13\_CH4\_1yr\_Rhodes2016.txt
  - Chemistry\_data\_Tunu13\_B40
    - \* B40\_Na\_Rhodes2016.txt
    - \* Tunu13\_nssCa\_Cl\_Rhodes2016.txt
  - Discrete\_CH4\_melt\_layers\_Tunu13
    - \* Tunu13\_discreteCH4\_Rhodes\_2016.xlsx
    - \* Tunu13\_meltlayers\_Rhodes2016.xlsx
  - Firn\_air\_transport\_model\_simulations
    - \* Model\_Simulation\_WD\_trappingsignal\_Rhodes2016.xlsx
  - RRhodes\_2016\_Supplementary Information.pdf
  - Raw\_CH4\_spline\_residuals
    - \* .DS\_Store
    - \* B40\_CH4\_idx18Sep2013\_rawdata\_spline\_residuals\_Rhodes2016.txt
    - \* B40\_CH4\_rawdata\_spline\_residuals\_Rhodes2016.txt
    - \* D4\_CH4\_rawdata\_spline\_residuals\_Rhodes2016.txt
    - \* NGRIP\_CH4\_rawdata\_spline\_residuals\_Rhodes2016.txt
    - \* Rhodes2016\_CH4data\_readme.rtf

- \* Tunu13\_CH4\_rawdata\_spline\_residuals\_Rhodes2016.txt
- \_\_MACOSX
  - .\_Rhodes\_CP\_2016\_Supplement
  - Rhodes\_CP\_2016\_Supplement
    - \* .\_DS\_Store
    - \* .\_CH4\_allcores\_1yr\_resample\_Fig2
    - \* .\_Chemistry\_data\_Tunu13\_B40
    - \* .\_Discrete\_CH4\_melt\_layers\_Tunu13
    - \* .\_Firn\_air\_transport\_model\_simulations
    - \* .\_RRhodes\_2016\_Supplementary Information.pdf
    - \* .\_Raw\_CH4\_spline\_residuals
    - \* CH4\_allcores\_1yr\_resample\_Fig2
    - \* Chemistry\_data\_Tunu13\_B40
    - \* Discrete\_CH4\_melt\_layers\_Tunu13
    - \* Firn\_air\_transport\_model\_simulations
    - \* Raw\_CH4\_spline\_residuals

The copyright of individual parts of the supplement might differ from the CC-BY 3.0 licence.
